# Supplementary material for: Electrocatalytic water oxidation by copper(ii) complexes with a pentadentate amine-pyridine ligand
Source: Royal Society of Chemistry journal article supplement (doi:10.1039/d1se01955d), 2022-01-01
Supplement: d1se01955d1.pdf [file d1se01955d1.pdf]

## Electrocatalytic water oxidation by copper(II) complexes with pentadentate amine-pyridine ligand

Junqi Lin<sup>a\*</sup>, Nini Wang<sup>a</sup>, Xin Chen<sup>a</sup>, Xueli Yang<sup>a</sup>, Li Hong<sup>a</sup>, Zhijun Ruan<sup>a</sup>, Hui Ye<sup>a</sup>, Yanmei Chen<sup>a\*</sup> and Xiangming Liang<sup>b\*</sup>

<sup>a</sup> Hubei Key Laboratory of Processing and Application of Catalytic Materials, College of Chemistry and Chemical Engineering, Huanggang Normal University, Huanggang, 438000 China.

<sup>b</sup> Institute for New Energy Materials & Low Carbon Technologies, School of Materials Science and Engineering, Tianjin University of Technology, Tianjin 300384 China.

Email: linjunqi@hgnu.edu.cn, cingym@163.com, liangxm6@163.com

**Table S1** Crystallographic data and processing parameters for **1**

| Complex parameters                       | [Cu(MeL)](ClO <sub>4</sub> ) <sub>2</sub> ( <b>1</b> )                          |
|------------------------------------------|---------------------------------------------------------------------------------|
| Empirical formula                        | C <sub>17</sub> H <sub>25</sub> Cl <sub>2</sub> CuN <sub>5</sub> O <sub>8</sub> |
| Formula weight                           | 561.86                                                                          |
| Temperature / K                          | 293(2)                                                                          |
| Wavelength / Å                           | 0.71073                                                                         |
| Crystal system                           | Monoclinic                                                                      |
| Space group                              | P2 <sub>1</sub> /c                                                              |
| <i>a</i> / Å                             | 16.020(8)                                                                       |
| <i>b</i> / Å                             | 15.121(8)                                                                       |
| <i>c</i> / Å                             | 9.891(5)                                                                        |
| <i>α</i> / deg                           | 90                                                                              |
| <i>β</i> / deg                           | 102.122                                                                         |
| <i>γ</i> / deg                           | 90                                                                              |
| Volume / Å <sup>3</sup>                  | 2343(2)                                                                         |
| <i>Z</i>                                 | 4                                                                               |
| Calculated density / Mg m <sup>3</sup>   | 1.593                                                                           |
| Absorption coefficient                   | 1.213                                                                           |
| <i>F</i> (000)                           | 1156                                                                            |
| Crystal size / mm                        | 0.22 × 0.20 × 0.18                                                              |
| <i>θ</i> range / deg                     | 2.500 to 21.726                                                                 |
| Index ranges                             | -16 ≤ <i>h</i> ≤ 16<br>-15 ≤ <i>k</i> ≤ 15<br>-10 ≤ <i>l</i> ≤ 10               |
| Reflections collected                    | 27747                                                                           |
| Independent reflections                  | 2728 [R(int) = 0.1283]                                                          |
| Completeness to <i>θ</i> = 24.792°       | 98.2 %                                                                          |
| Absorption correction                    | Semi-empirical from equivalents                                                 |
| Max. and min. transmission               | 0.7446 and 0.4096                                                               |
| Refinement method                        | Full-matrix least-squares on <i>F</i> <sup>2</sup>                              |
| Data / restraints / parameters           | 2728 / 20 / 299                                                                 |
| Goodness-of-fit on <i>F</i> <sup>2</sup> | 1.101                                                                           |
| Final R indices [I > 2σ(I)]              | <i>R</i> <sub>1</sub> = 0.0876, <i>wR</i> <sub>2</sub> = 0.2371                 |
| R indices (all data)                     | <i>R</i> <sub>1</sub> = 0.1353, <i>wR</i> <sub>2</sub> = 0.2774                 |
| Largest diff. peak and hole              | 0.715 and -0.416 e.Å <sup>-3</sup>                                              |

$$R_1 = \frac{\sum ||F_o| - |F_c||}{\sum |F_o|}, wR_2 = \left[ \frac{\sum (|F_o|^2 - |F_c|^2)^2}{\sum (F_o^2)} \right]^{1/2}$$

**Table S2** Crystallographic data and processing parameters for **2**

| Complex parameters                       | [Cu(L)](ClO <sub>4</sub> ) <sub>2</sub> ( <b>2</b> )                            |
|------------------------------------------|---------------------------------------------------------------------------------|
| Empirical formula                        | C <sub>16</sub> H <sub>23</sub> Cl <sub>2</sub> CuN <sub>5</sub> O <sub>8</sub> |
| Formula weight                           | 547.83                                                                          |
| Temperature / K                          | 293(2)                                                                          |
| Wavelength / Å                           | 0.71073                                                                         |
| Crystal system                           | Orthorhombic                                                                    |
| Space group                              | Pbca                                                                            |
| <i>a</i> / Å                             | 14.9870(3)                                                                      |
| <i>b</i> / Å                             | 9.9557(3)                                                                       |
| <i>c</i> / Å                             | 29.6358(7)                                                                      |
| <i>α</i> / deg                           | 90                                                                              |
| <i>β</i> / deg                           | 90                                                                              |
| <i>γ</i> / deg                           | 90                                                                              |
| Volume / Å <sup>3</sup>                  | 4421.84(19)                                                                     |
| <i>Z</i>                                 | 8                                                                               |
| Calculated density / Mg m <sup>3</sup>   | 1.646                                                                           |
| Absorption coefficient                   | 1.283                                                                           |
| <i>F</i> (000)                           | 2248                                                                            |
| Crystal size / mm                        | 0.27 × 0.21 × 0.19                                                              |
| <i>θ</i> range / deg                     | 1.933 to 24.792                                                                 |
| Index ranges                             | -17 ≤ <i>h</i> ≤ 16<br>-11 ≤ <i>k</i> ≤ 11<br>-34 ≤ <i>l</i> ≤ 34               |
| Reflections collected                    | 55423                                                                           |
| Independent reflections                  | 3797 [R(int) = 0.0710]                                                          |
| Completeness to <i>θ</i> = 24.792°       | 99.9 %                                                                          |
| Absorption correction                    | Semi-empirical from equivalents                                                 |
| Max. and min. transmission               | 0.7451 and 0.6188                                                               |
| Refinement method                        | Full-matrix least-squares on <i>F</i> <sup>2</sup>                              |
| Data / restraints / parameters           | 3797 / 20 / 313                                                                 |
| Goodness-of-fit on <i>F</i> <sup>2</sup> | 1.088                                                                           |
| Final R indices [I > 2σ(I)]              | <i>R</i> <sub>1</sub> = 0.0830, <i>wR</i> <sub>2</sub> = 0.2644                 |
| R indices (all data)                     | <i>R</i> <sub>1</sub> = 0.1044, <i>wR</i> <sub>2</sub> = 0.2947                 |
| Largest diff. peak and hole              | 1.580 and -0.966 e.Å <sup>-3</sup>                                              |

$$R_1 = \frac{\sum ||F_o| - |F_c||}{\sum |F_o|}, wR_2 = \left[ \frac{\sum (|F_o|^2 - |F_c|^2)^2}{\sum (F_o^2)} \right]^{1/2}$$

**Table S3** Crystallographic data and processing parameters for **3**

| Complex parameters                       | [Zn(L)](ClO <sub>4</sub> ) <sub>2</sub> ( <b>3</b> )                             |
|------------------------------------------|----------------------------------------------------------------------------------|
| Empirical formula                        | C <sub>16</sub> H <sub>23</sub> Cl <sub>2</sub> N <sub>5</sub> O <sub>8</sub> Zn |
| Formula weight                           | 549.66                                                                           |
| Temperature / K                          | 293(2)                                                                           |
| Wavelength / Å                           | 0.71073                                                                          |
| Crystal system                           | Tetragonal                                                                       |
| Space group                              | P4 <sub>1</sub>                                                                  |
| <i>a</i> / Å                             | 8.87310(10)                                                                      |
| <i>b</i> / Å                             | 8.87310(10)                                                                      |
| <i>c</i> / Å                             | 28.4194(6)                                                                       |
| <i>α</i> / deg                           | 90                                                                               |
| <i>β</i> / deg                           | 90                                                                               |
| <i>γ</i> / deg                           | 90                                                                               |
| Volume / Å <sup>3</sup>                  | 2237.51(7)                                                                       |
| <i>Z</i>                                 | 4                                                                                |
| Calculated density / Mg m <sup>3</sup>   | 1.632                                                                            |
| Absorption coefficient                   | 1.389                                                                            |
| <i>F</i> (000)                           | 1128                                                                             |
| Crystal size / mm                        | 0.22 x 0.20 x 0.17                                                               |
| <i>θ</i> range / deg                     | 2.295 to 27.111                                                                  |
| Index ranges                             | -11 ≤ <i>h</i> ≤ 10<br>-11 ≤ <i>k</i> ≤ 11<br>-36 ≤ <i>l</i> ≤ 36                |
| Reflections collected                    | 39361                                                                            |
| Independent reflections                  | 4948 [R(int) = 0.0824]                                                           |
| Completeness to <i>θ</i> = 24.792°       | 100.0 %                                                                          |
| Absorption correction                    | Semi-empirical from equivalents                                                  |
| Max. and min. transmission               | 0.7455 and 0.6673                                                                |
| Refinement method                        | Full-matrix least-squares on <i>F</i> <sup>2</sup>                               |
| Data / restraints / parameters           | 4948 / 15 / 283                                                                  |
| Goodness-of-fit on <i>F</i> <sup>2</sup> | 1.082                                                                            |
| Final R indices [I > 2σ(I)]              | <i>R</i> <sub>1</sub> = 0.1038, <i>wR</i> <sub>2</sub> = 0.3145                  |
| R indices (all data)                     | <i>R</i> <sub>1</sub> = 0.1092, <i>wR</i> <sub>2</sub> = 0.3173                  |
| Largest diff. peak and hole              | 0.893 and -0.917 e.Å <sup>-3</sup>                                               |

$$R_1 = \frac{\sum ||F_o| - |F_c||}{\sum |F_o|}, wR_2 = \left[ \frac{\sum (|F_o|^2 - |F_c|^2)^2}{\sum (F_o^2)} \right]^{1/2}$$

**Table S4** Selected bond lengths (Å) and angles (deg) for complex **1–3**

| Complex           | <b>1</b>  | <b>2</b>  | <b>3</b> |           |
|-------------------|-----------|-----------|----------|-----------|
| Bond length (Å)   |           |           |          |           |
| Cu–N1             | 2.051(10) | 2.029(6)  | Zn–N1    | 2.115(13) |
| Cu–N2             | 2.205(9)  | 1.966(8)  | Zn–N2    | 2.112(15) |
| Cu–N3             | 2.090(12) | 2.005(7)  | Zn–N3    | 2.196(17) |
| Cu–N4             | 1.973(11) | 2.155(6)  | Zn–N4    | 2.148(14) |
| Cu–N5             | 2.001(10) | 2.108(5)  | Zn–N5    | 2.111(13) |
| Bond angles (deg) |           |           |          |           |
| N1–Cu–N2          | 79.6(4)   | 83.1(2)   | N1–Zn–N2 | 79.2(6)   |
| N1–Cu–N3          | 95.0(5)   | 162.3(3)  | N1–Zn–N3 | 157.4(6)  |
| N1–Cu–N4          | 165.8(5)  | 106.8(2)  | N1–Zn–N4 | 100.7(5)  |
| N1–Cu–N5          | 97.4(4)   | 96.98(19) | N1–Zn–N5 | 95.8(5)   |
| N2–Cu–N3          | 85.1(5)   | 79.2(3)   | N2–Zn–N3 | 79.4(6)   |
| N2–Cu–N4          | 114.5(5)  | 129.4(4)  | N2–Zn–N4 | 118.2(6)  |
| N2–Cu–N5          | 106.8(4)  | 149.4(4)  | N2–Zn–N5 | 162.8(6)  |
| N3–Cu–N4          | 84.8(5)   | 84.7(3)   | N3–Zn–N4 | 82.8(6)   |
| N3–Cu–N5          | 164.1(5)  | 98.2(3)   | N3–Zn–N5 | 106.8(6)  |
| N4–Cu–N5          | 80.7(5)   | 80.1(2)   | N4–Zn–N5 | 78.8(5)   |

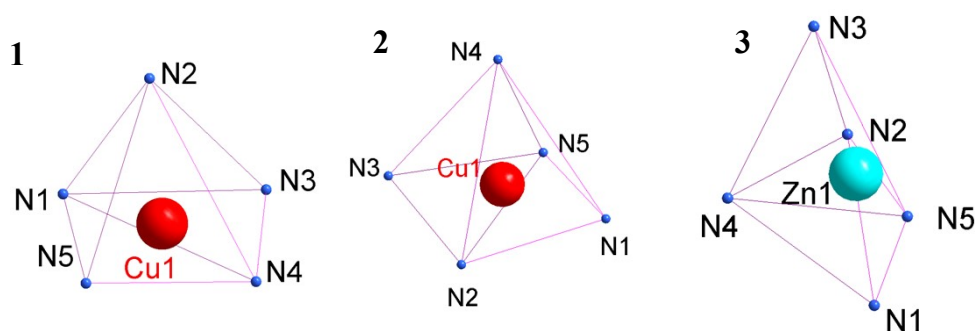**Fig. S1** The geometry configuration of complex **1–3**.

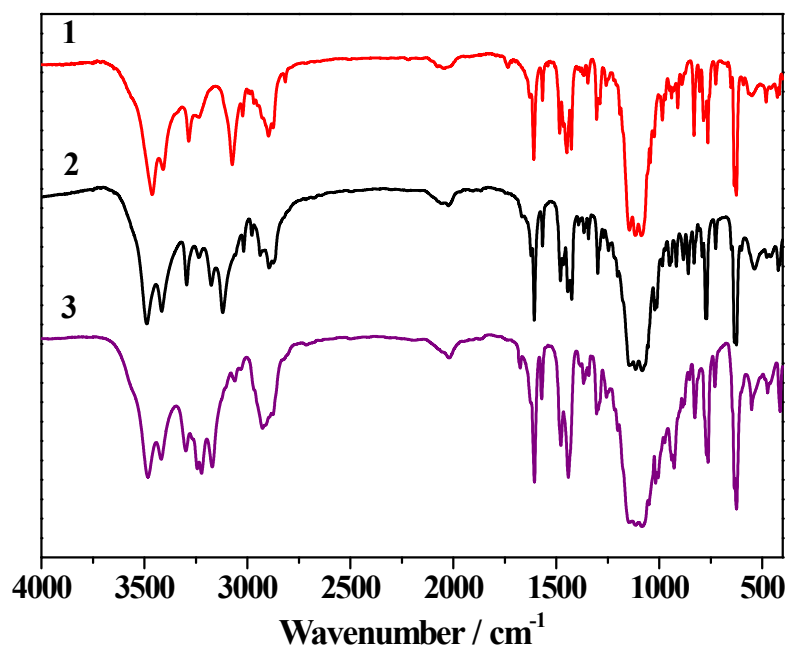

Fig. S2 The overlaid IR spectra of complex 1–3.

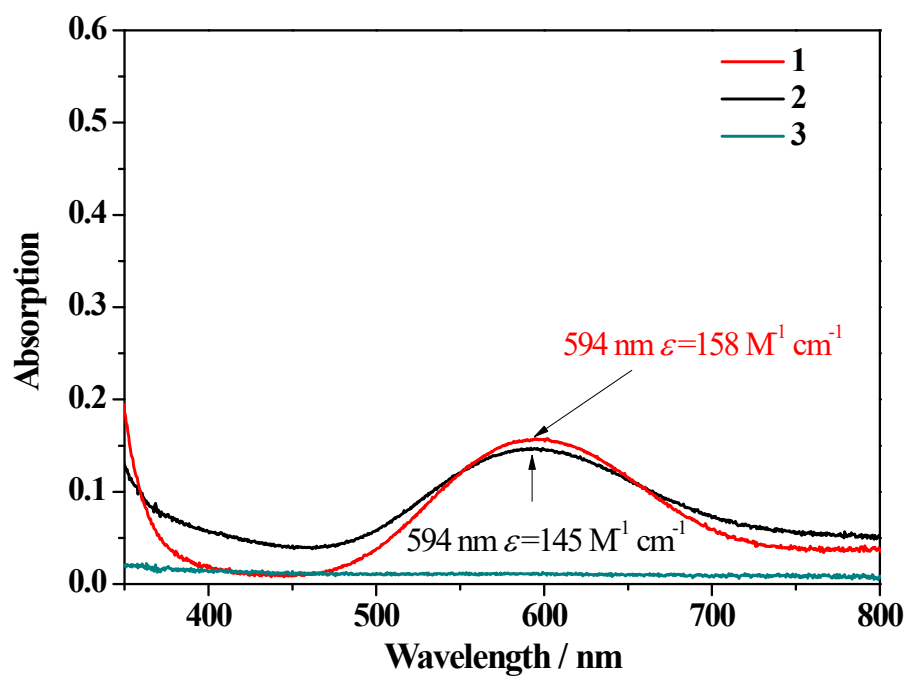

Fig. S3 UV-vis spectra of 1 mM complex 1–3 in pure water.

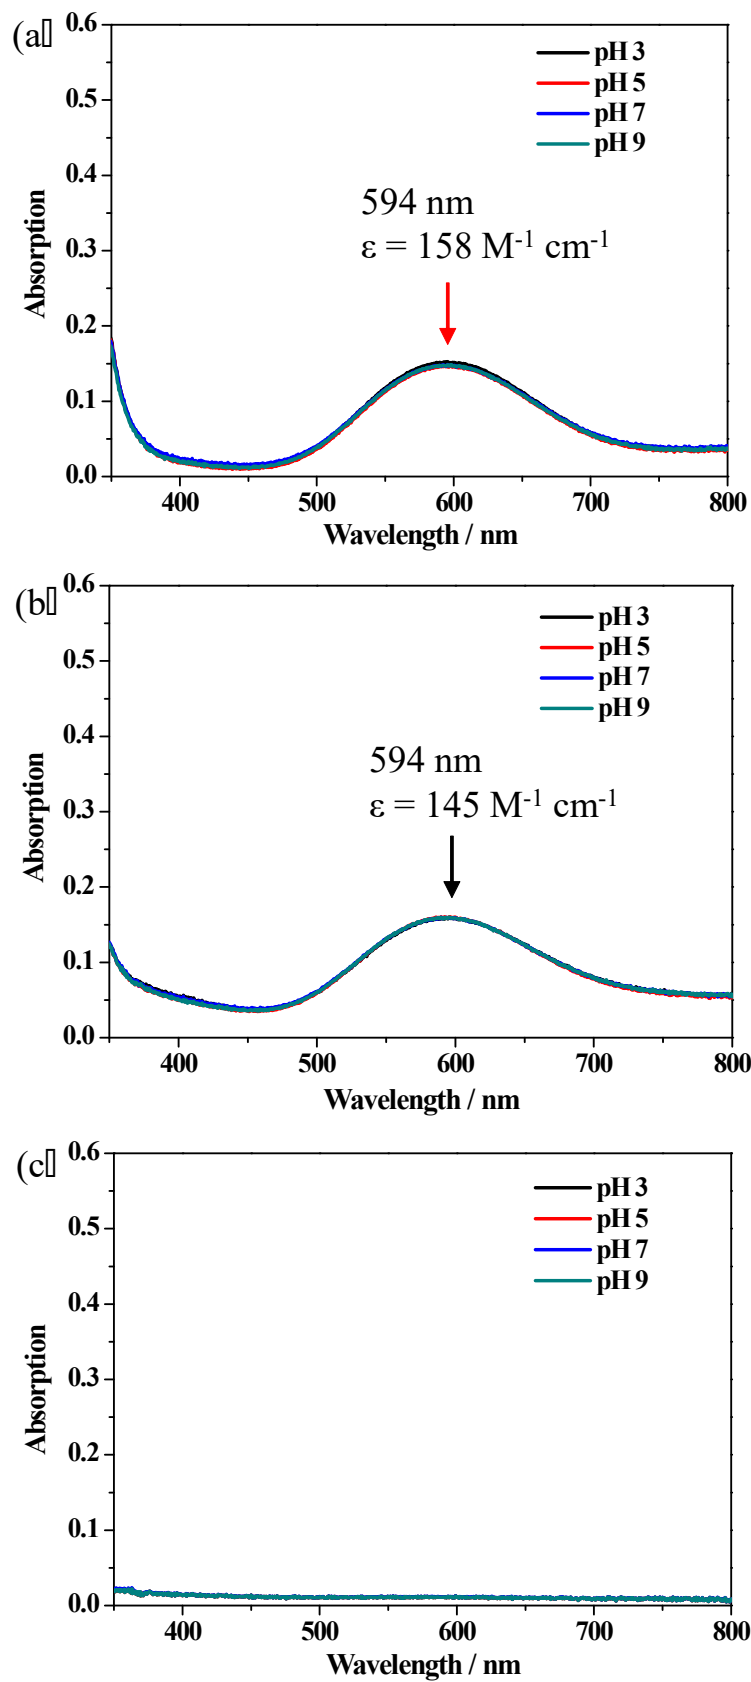

**Fig. S4** UV-vis spectra of 1 mM complex 1 (a), 2 (b), 3 (c) in 0.1 M phosphate buffer solution at various pH.

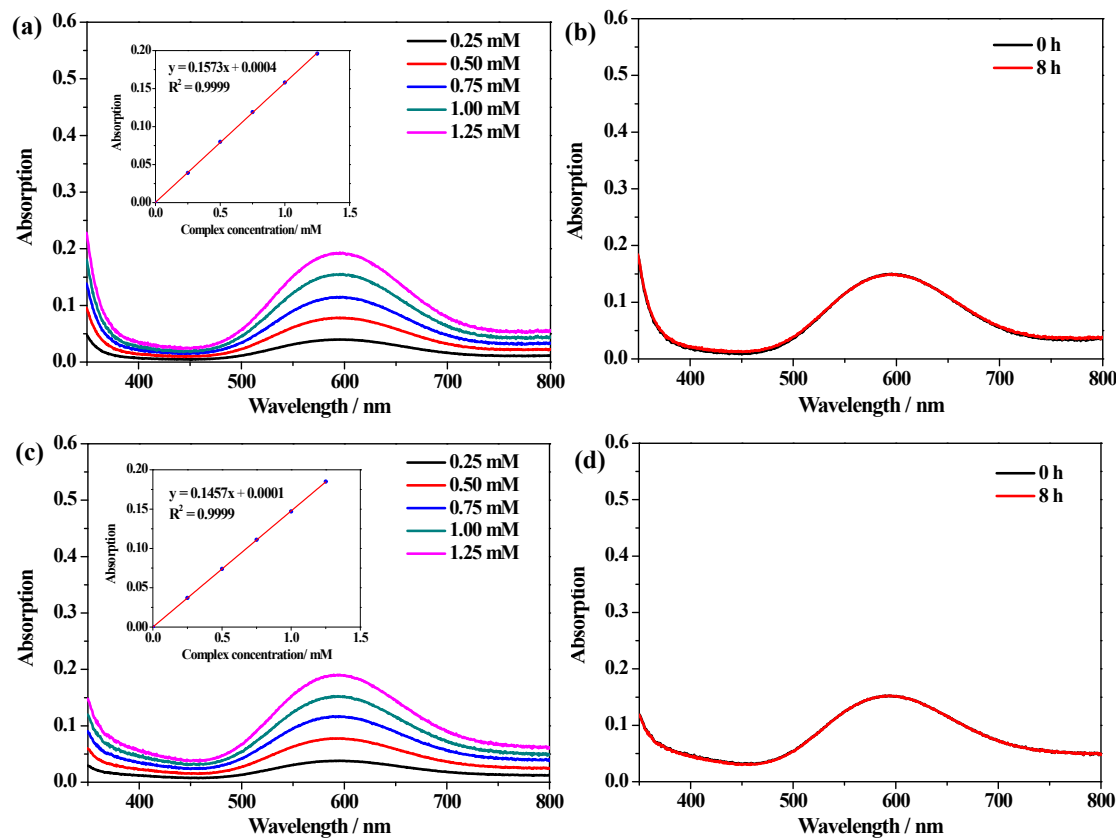

**Fig. S5** Concentration-dependent UV-vis absorption spectra of complex **1** (a) and **2** (c) in 0.1 M phosphate buffer solution at pH 7.0; Time-dependent UV-vis absorption spectra of 1 mM complex **1** (b) and **2** (d) in 0.1 M phosphate buffer solution at pH 7.0.

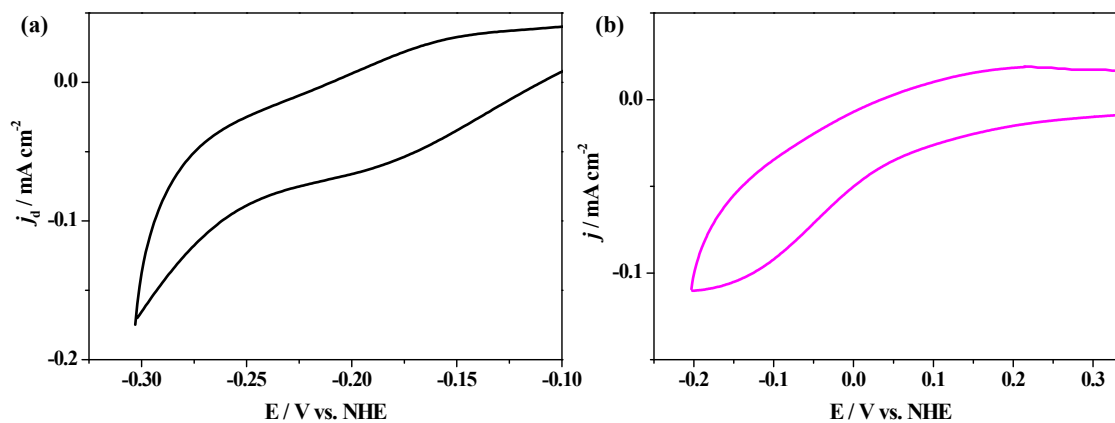

**Fig. S6** The  $\text{Cu}^{\text{I}}/\text{Cu}^{\text{II}}$  couple of **1** (a) and **2** (b) in 0.1 M phosphate buffer solution at pH 7.0, scan rate = 100 mV/s.



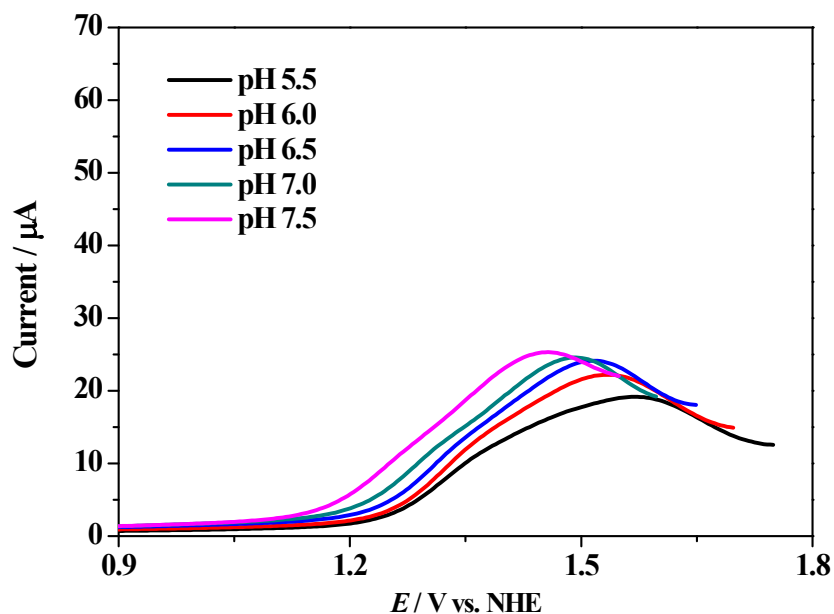

**Fig. S7** DPV tests of 1.0 mM of **1** in 0.1 M phosphate buffer solution at various pH. DPVs were obtained with the following parameters: amplitude = 50 mV, step height = 4 mV, pulse width = 0.05 s, pulse period = 0.5 s and sampling width = 0.0167 s.

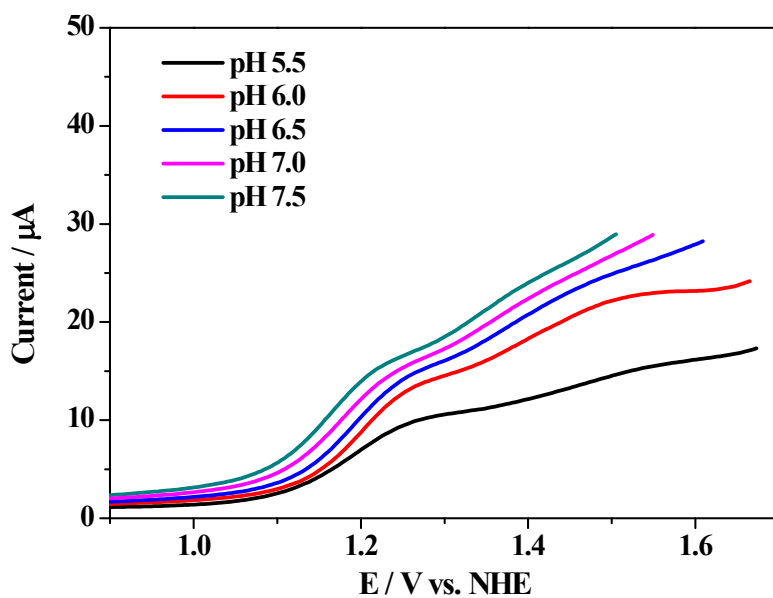

**Fig. S8** DPV tests of 1.0 mM of **2** in 0.1 M phosphate buffer solution at various pH. DPVs were obtained with the following parameters: amplitude = 50 mV, step height = 4 mV, pulse width = 0.05 s, pulse period = 0.5 s and sampling width = 0.0167 s.

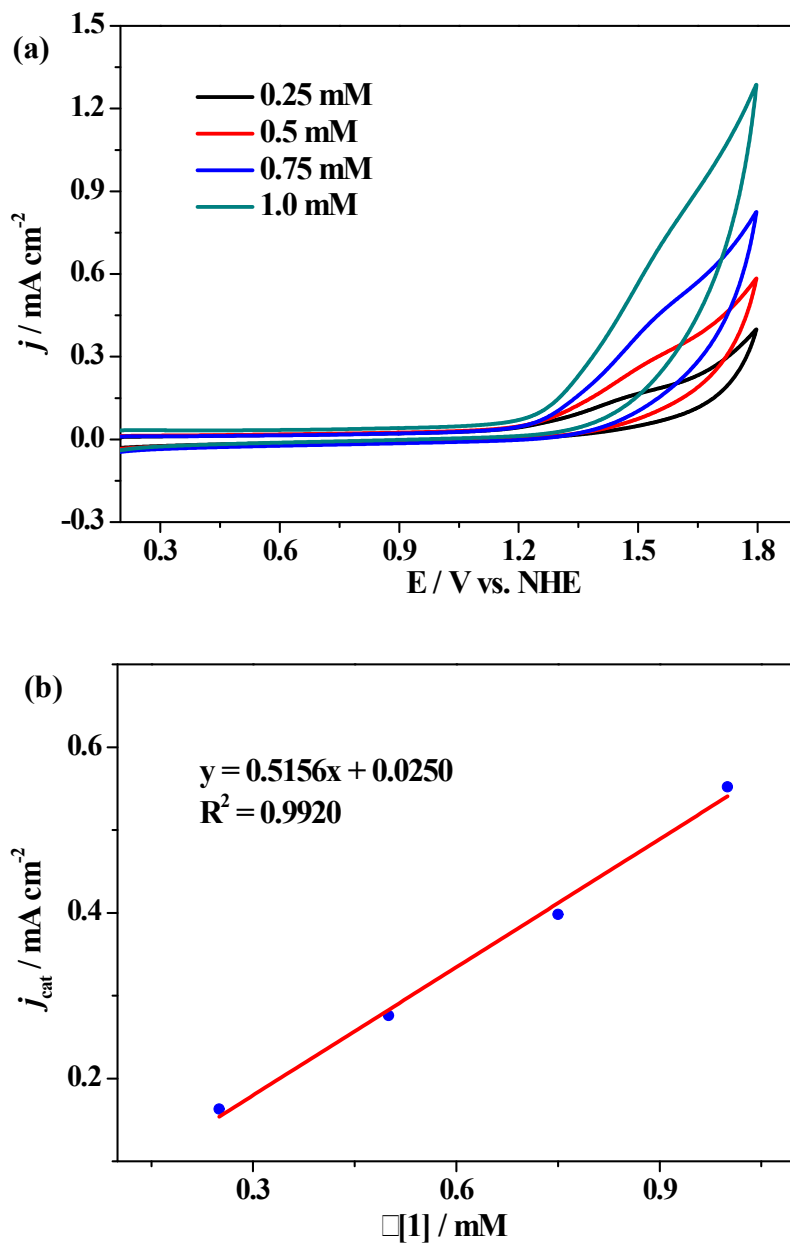

**Fig. S9** Cyclic voltammograms of various concentration of **1** in 0.1 M PBSs at pH 7.0 with scan rate of  $100 \text{ mV s}^{-1}$  (a) and the dependence of  $j_{\text{cat}}$  on the concentration of **1** in 0.1 M PBSs at pH 7.0 (b).

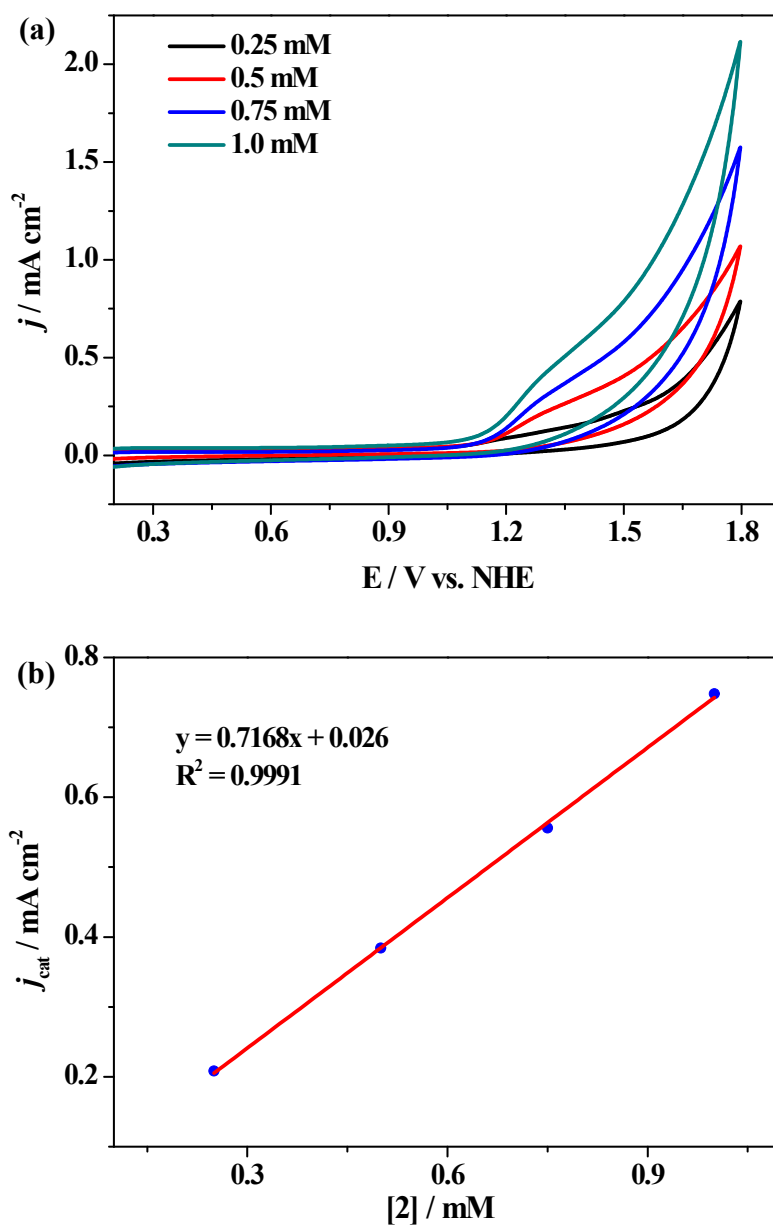

**Fig. S10** Cyclic voltammograms of various concentration of **2** in 0.1 M PBSs at pH 7.0 with scan rate of  $100 \text{ mV s}^{-1}$  (a) and the dependence of  $j_{\text{cat}}$  on the concentration of **2** in 0.1 M PBSs at pH 7.0 (b).

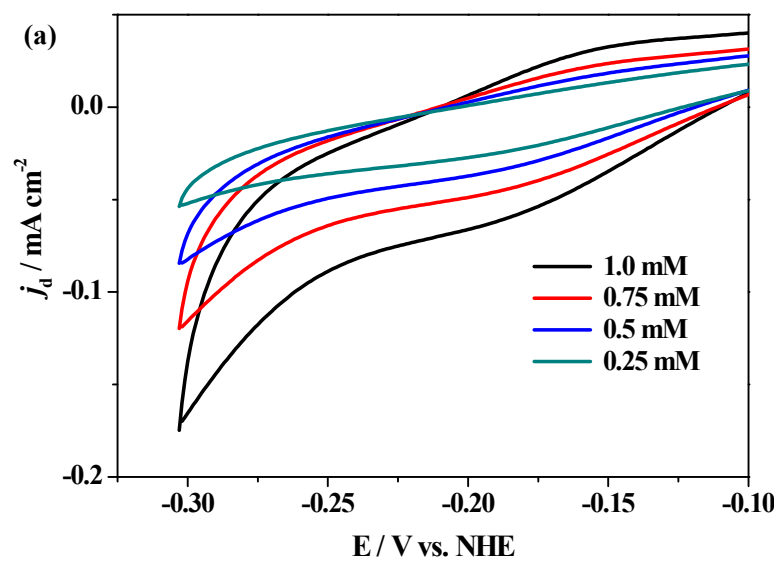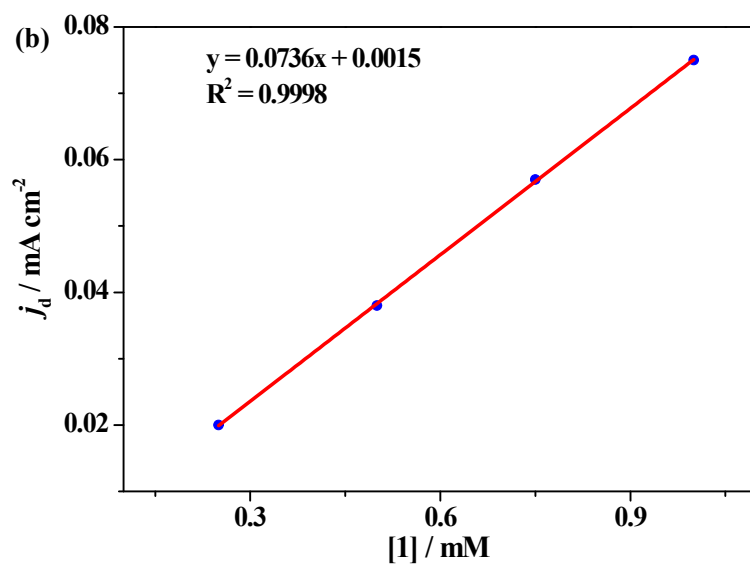

**Fig. S11** Cyclic voltammograms of 1.0 mM of **1** with various concentration (a) and dependence of reduction wave current density of the  $\text{Cu}^{\text{I}}/\text{Cu}^{\text{II}}$  couple of **1** on its concentration (b).

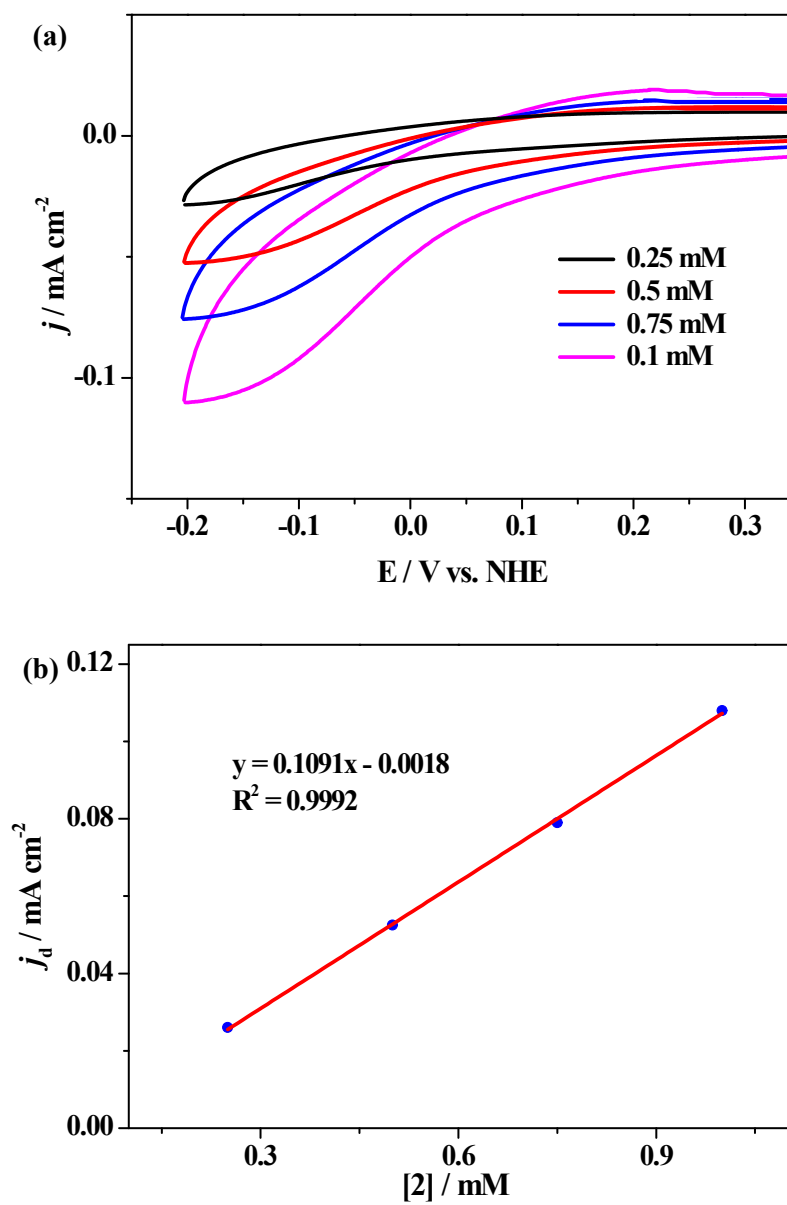

**Fig. S12** Cyclic voltammograms of 1.0 mM of **2** with various concentration (a) and dependence of reduction wave current density of the Cu<sup>I</sup>/Cu<sup>II</sup> couple of **2** on its concentration (b).

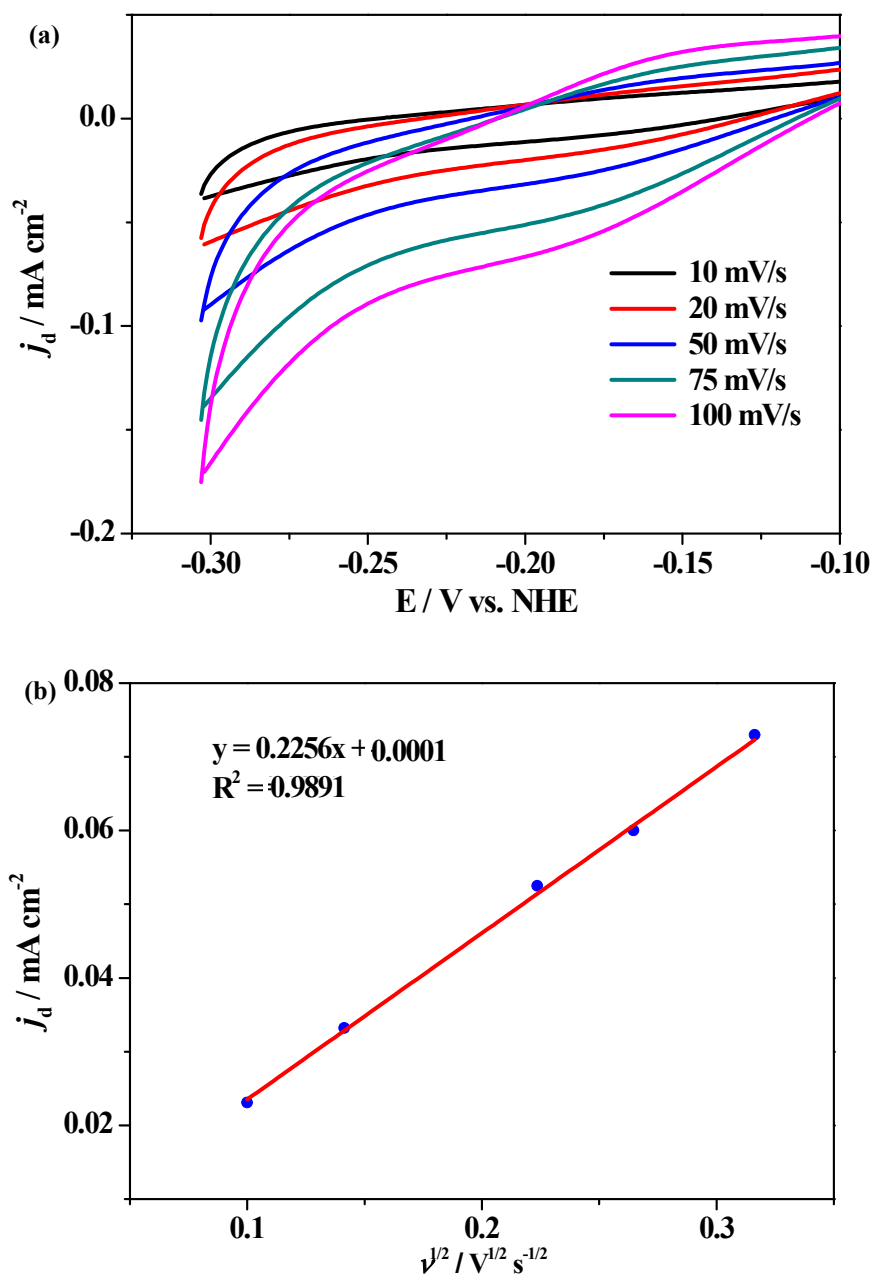

**Fig. S13** CV of 1.0 mM of **1** with various scan rate (a) and dependence of reduction wave current density of the  $\text{Cu}^{\text{I}}/\text{Cu}^{\text{II}}$  couple of **1** on the square root of scan rates (b).

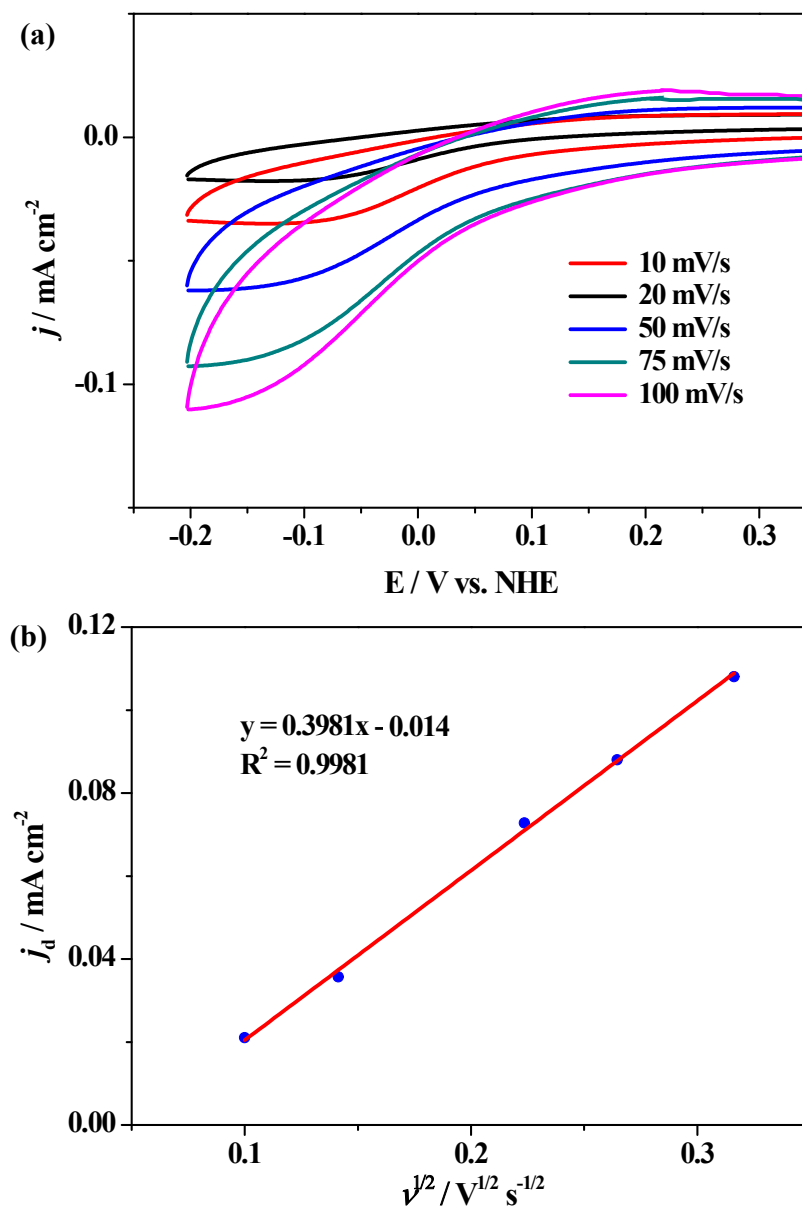

**Fig. S14** CV of 1.0 mM of **2** with various scan rate (a) and dependence of reduction wave current density of the  $\text{Cu}^{\text{I}}/\text{Cu}^{\text{II}}$  couple of **2** on the square root of scan rates (b).

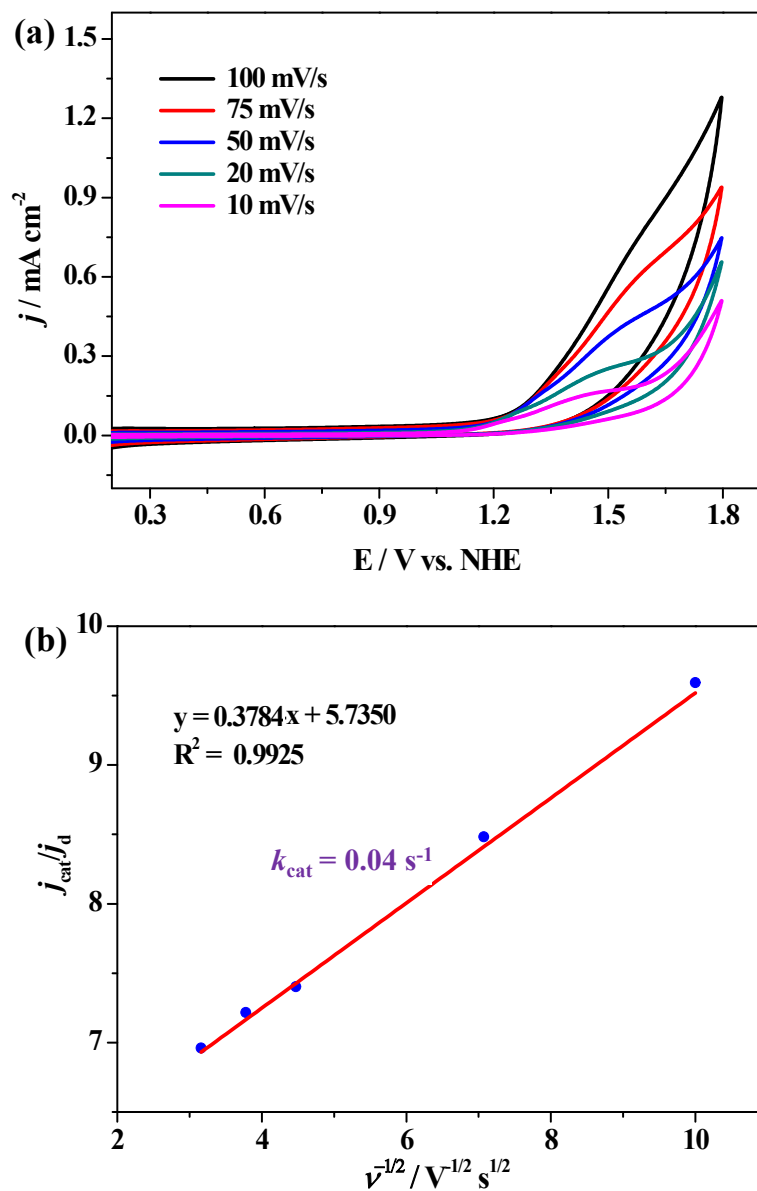

**Fig. S15** CV of 1.0 mM of **1** in 0.1 M PBSs with scan rate varying from 10 to 100 mV s<sup>-1</sup> (a) and plots of the ratio of  $j_{\text{cat}}$  to  $j_d$  of **1** versus the reciprocal of the square root of the scan rate (b).



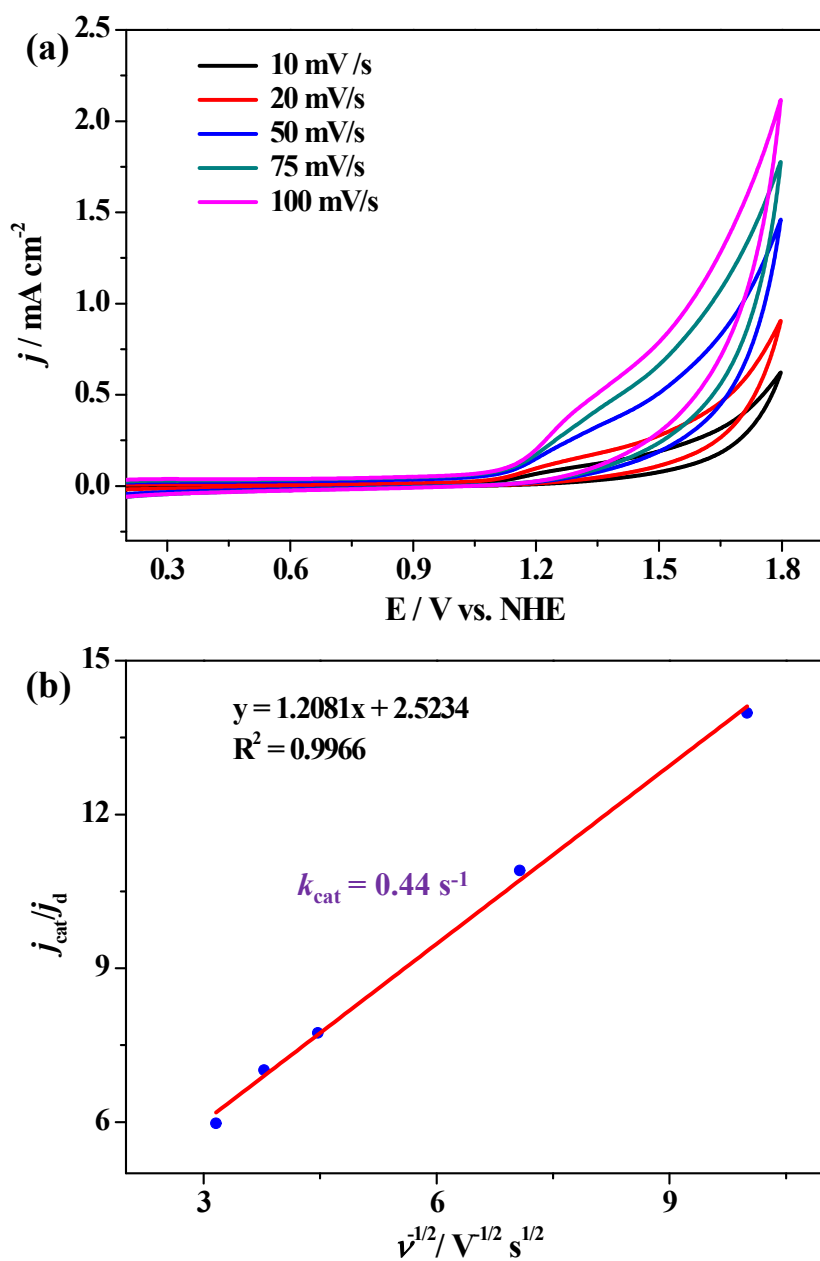

**Fig. S16** CV of 1.0 mM of **2** in 0.1 M PBSs with scan rate varying from 10 to 100 mV s<sup>-1</sup> (a) and plots of the ratio of  $j_{\text{cat}}$  to  $j_{\text{d}}$  of **2** versus the reciprocal of the square root of the scan rate (b).

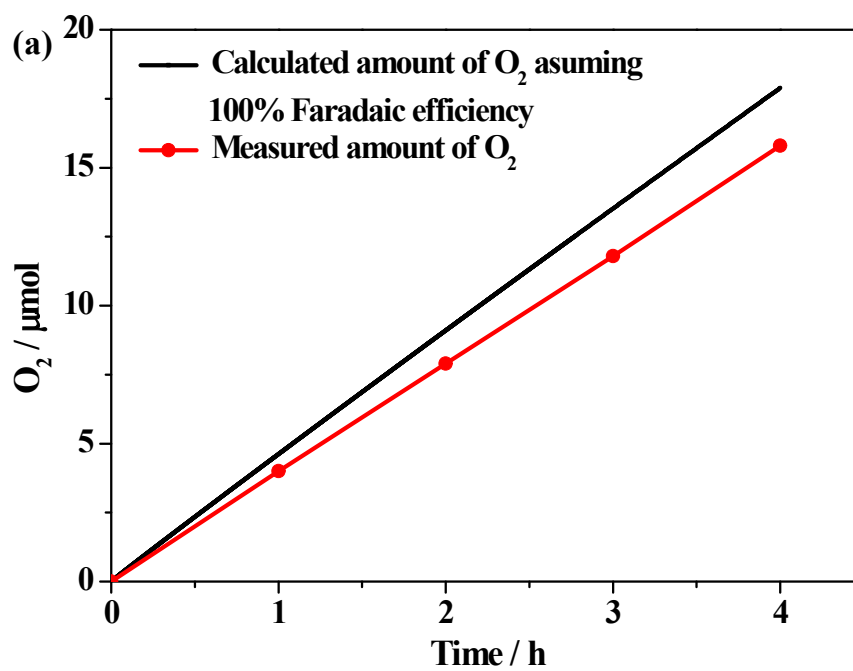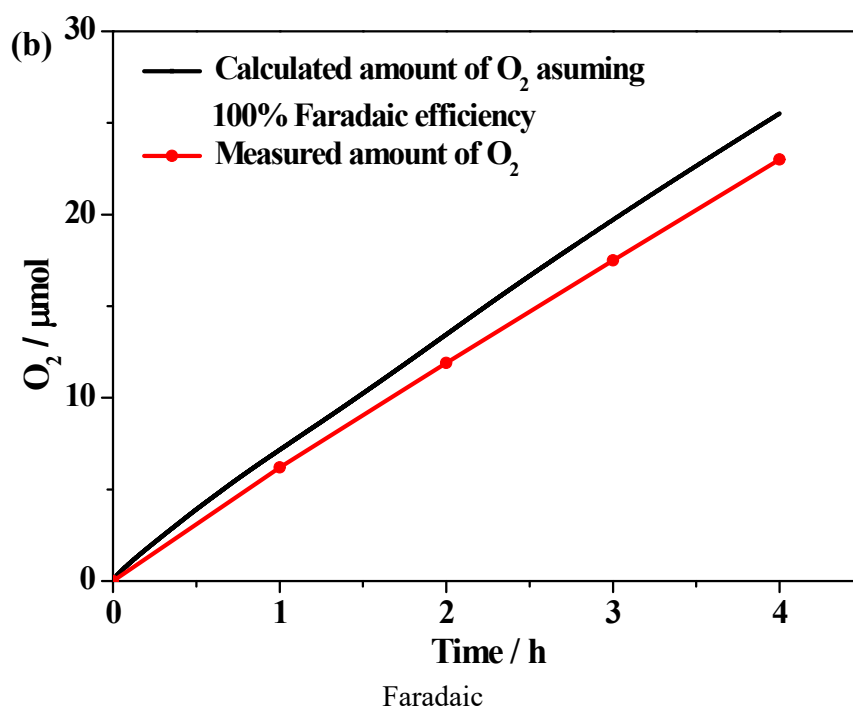

**Fig. S17** Faradaic efficiency of O<sub>2</sub> evolution for **1** (a) and **2** (b) under 4 h of electrolysis at 1.70 V vs. NHE in 0.1 M PBS at pH 7.0.

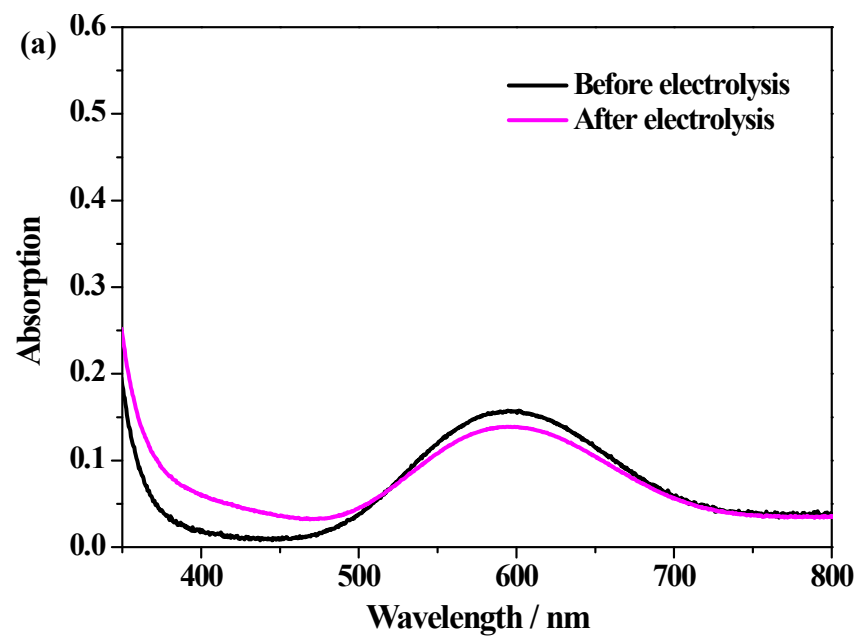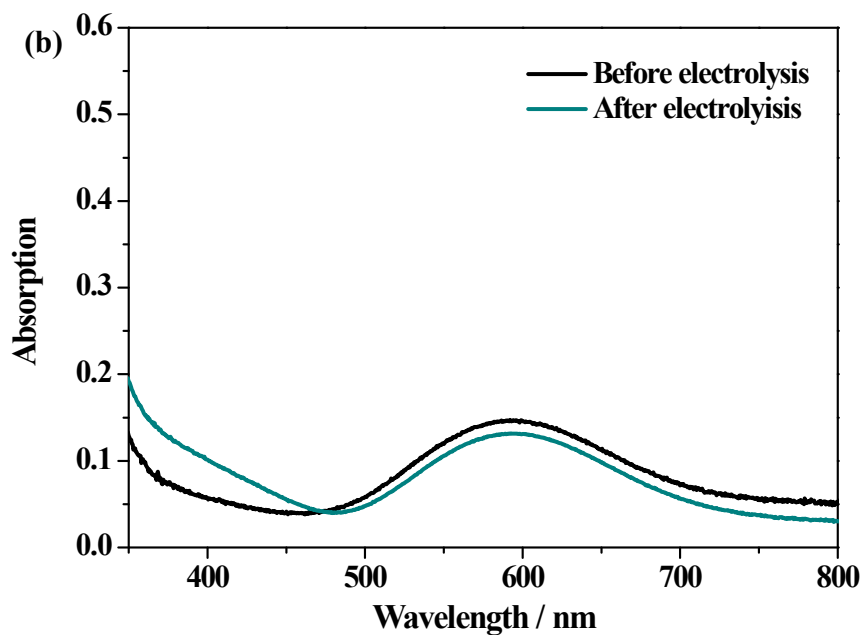

**Fig. S18** UV-visible measurements of **1** (a) and **2** (b) in 0.1 M PBS at pH 7.0 before and after 4 h controlled potential electrolysis at 1.70 V vs. NHE. Initial concentration of **1** and **2** was 1 mM.

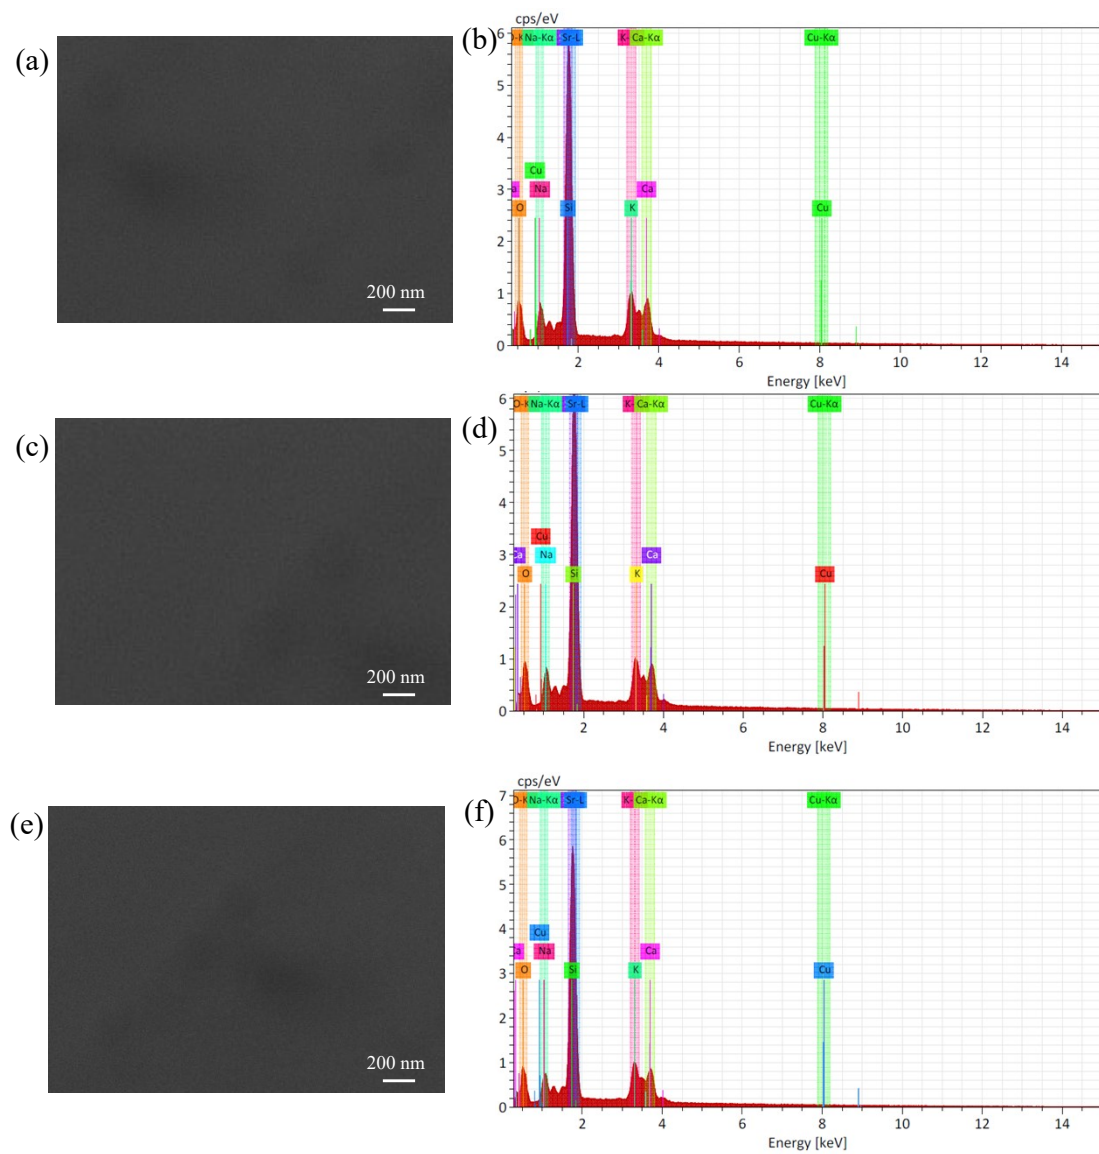

**Fig. S19** SEM images and EDX analysis result of the surface of ITO electrode before (a and b) and after 4 h CPE experiments of **1** (c and d) and **2** (e and f) in 0.1 M phosphate buffer solution at neutral pH.
